# Supplementary material for: Detecting Key Functional Components Group and Speculating the Potential Mechanism of Xiao-Xu-Ming Decoction in Treating Stroke
Source: Front Cell Dev Biol. 2022 May 12;10:753425. doi: 10.3389/fcell.2022.753425 (PMC9136080; doi:10.3389/fcell.2022.753425)
Supplement: Supplementary file 5 [file Table9.xlsx]

## Sheet: Table S10_1489 coms of non-KFCG
ID	Molecule_name
MOL000927	α-muurolene
MOL000489	(1S,4aR,8aR)-1-isopropyl-7-methyl-4-methylene-2,3,4a,5,6,8a-hexahydro-1H-naphthalene
MOL003533	Bicyclo[4.4.0]dec-1-ene,2-isopropy-5-methyl-9-methylene-
MOL003532	(1R)-1-(4-methylphenyl)ethanol
MOL003531	3-methoxycinnamaldehyde
MOL003530	O-METHOXYCINNAMALDEHYDE
MOL003528	METHYLBENZOFURAN
MOL003527	Tyranton
MOL003526	Cinnamyl acetate
MOL003524	Benzenepropanol
MOL003523	hexadec-11-enal
MOL003521	Isohomogenol
MOL003047	[(1S)-endo]-(-)-Borneol
MOL003032	BZM
MOL002841	l-alpha-Fenchone
MOL002836	anisaldehyde
MOL002541	WLN: VH2R
MOL000250	cis-Cinnamaldehyde
MOL002458	ZINC01850974
MOL002225	Styrone
MOL001862	Cadalin
MOL001853	2-Acetyl-6-methoxynaphthalene
MOL001237	o-Acetyltoluene
MOL009195	(4S,5R)Ephedroxane
MOL012445	4-[(3R)-3-hydroxybutyl]phenol
MOL012346	(4aS,6aR,6aS,6bR,8aR,9R,10S,11R,12aR,14bS)-10,11-dihydroxy-2,2,6a,6b,9,12a-hexamethyl-9-methylol-1,3,4,5,6,6a,7,8,8a,10,11,12,13,14b-tetradecahydropicene-4a-carboxylic acid
MOL011876	(2S,5R)-2-isopropenyl-5-methyl-1-cyclohexanone
MOL011875	Eriodictiol-7-glucoside
MOL011873	cinerolon
MOL011872	()-Menthone
MOL011865	rosmarinic acid
MOL011855	Schizonol
MOL011854	Schizonodiol
MOL011848	d-Piperitone
MOL011842	(R)-()-3-Methylcyclopentanone
MOL011840	EAK
MOL011838	(5S)-3,5-dimethylcyclohex-2-en-1-one
MOL011837	3,5-diformyl-2,4-dihydroxy-6-methylbenzoic acid
MOL011836	1,3-Heptadiene, 3-ethyl-2-methyl-
MOL011835	1-Ethoxypentane
MOL011811	Tilianine
MOL011799	1,4-Eicosadiene
MOL010691	Ethyl palmitelaidate
MOL010564	NK
MOL010546	ST069309
MOL009807	CHD
MOL009568	Methylbenzylideneacetone
MOL009191	Cathine
MOL009181	mahuannin E
MOL009070	Luteolin 7-O-glucuronide
MOL008661	Vinyl amyl ketone
MOL008422	Afzelechin
MOL008208	TETRACONTANE
MOL008138	ZINC02011663
MOL007934	2-Hexanoylfuran
MOL007559	Hordenine
MOL007420	gamma-Terpineol
MOL007222	RNG
MOL007214	(+)-Leucocyanidin
MOL006866	Isosafrole
MOL006775	epi-Afzelechin
MOL005734	eupatilin
MOL005727	MIPK
MOL005563	(-)-Pulegone
MOL005559	Maslinic acid
MOL005135	Lauric anhydride
MOL005080	DMBQ
MOL004285	MBP
MOL003594	l-Carvyl acetate
MOL003587	Acoradiene
MOL003582	Prenol
MOL003534	CADINENE
MOL003449	(2S)-2-myristyloxirane
MOL003177	Syringaldehyde
MOL003083	ETHYL FURAN
MOL002786	Apocynin
MOL002375	(-)-isomenthone
MOL002374	()-Neomenthol
MOL002287	Rheosmin
MOL001856	Fleet-X
MOL001593	Piperitenone
MOL001541	4H-Benzopyran-4-one, 6-beta-D-glucopyranosyl-5-hydroxy-2-(4-hydroxyphenyl)-7-methoxy-
MOL000930	cis-.alpha.-Farnesene
MOL000871	Butylacetat
MOL000983	n-Triacontanol
MOL009813	(2R)-2-methylbutan-1-ol
MOL009194	()-N-Methylpseudoephedrine
MOL009190	Usaf cs-6
MOL009189	Tybraine
MOL000878	Farnesylacetone
MOL008767	2,6-Dimethylnaphthalene
MOL008702	eth
MOL003520	Damascenone
MOL008166	(E)-Pent-2-en-1-ol
MOL008152	Methyl heptoate
MOL008128	ZINC02042359
MOL007582	MIK
MOL007578	2-Methylpentan-3-one
MOL000748	HMF
MOL007340	Methyl carvacrol
MOL000722	beta-Cyclocitral
MOL000720	Safranal
MOL000704	styrene
MOL000677	(1R,4R)-4-isopropyl-1,6-dimethyltetralin
MOL006637	Psi-ephedrin
MOL006594	Eciphin
MOL005992	2,3-dimethyl-1-pentene
MOL000598	Octacosanol
MOL005609	76897_FLUKA
MOL005513	DBF
MOL005110	.alpha.-Ionene
MOL004746	(E,7S,11R)-3,7,11,15-tetramethylhexadec-2-en-1-ol
MOL004664	heptanoic acid
MOL010489	Resivit
MOL003992	2-PENTADECANONE
MOL003948	Cuminol
MOL003935	2,6-Dimethyl-1,3,5,7-octatetraene, E,E-
MOL003802	(2R)-2-ethylhexan-1-ol
MOL003574	α-gurjunene
MOL003573	calacorene
MOL003529	m-Methylacetophenone
MOL003525	Pyruvophenone
MOL003519	(E)-oct-2-en-4-one
MOL003507	Heptanol
MOL003484	PEY
MOL003416	Isobutyral
MOL002838	6-Methylheptan-2-one
MOL002830	PCR
MOL002818	Piceol
MOL002817	Picein
MOL002702	Nonacosanol
MOL002576	GBL
MOL002530	Isobutyl benzoate
MOL000247	(Z,Z)-farnesol
MOL002095	DEP
MOL002083	tricin
MOL000205	(6R)-6-isopropyl-3-methyl-1-cyclohex-2-enone
MOL002025	Tereton
MOL000193	(Z)-caryophyllene
MOL001859	FMT
MOL001604	Linalool
MOL011573	6-Hydroxykynurenate
MOL001103	[(3R)-3,7-dimethylocta-1,6-dien-3-yl] acetate
MOL010798	Cedreneoxide
MOL010797	Dehydroxylinalool oxide A
MOL010796	Promyr
MOL010795	1-propenyl-2-vinyl-4-methylcycloheptane
MOL010794	patchoulane
MOL010793	[(1S,4S)-4-isopropyl-1-cyclohex-2-enyl]methanol
MOL010792	1,5-dimethyl-4-(2-hexenyl)benzene
MOL010791	Trichloroicosylsilane
MOL013269	CLOVENE
MOL010789	1,5,8-trimethyl-1,2-dihydro-naphthalene
MOL010787	Trans-ionone
MOL010786	O-benzoyl-L-(+)-pseudoephedrine
MOL010785	()-N-Methylephedrine
MOL010784	isobutyric acid
MOL010783	carvenone
MOL010782	Methyl 2-decenoate
MOL010781	Ethyl 2-decenoate
MOL010780	Ephedroxane
MOL010779	DS
MOL010778	m-Ethylacetophenone
MOL010777	WLN: G1G
MOL010776	2-Butene, 2-phenyl-, (Z)-
MOL010775	Allyloxybenzene
MOL010774	[(2S)-6-methylhept-5-en-2-yl] acetate
MOL010773	1,3-p-Menthadien-7-al
MOL010772	Methylbenzylamine
MOL010771	(S)-1-Boc-3-methylpiperazine
MOL010770	3-Undecyne
MOL010769	Methyl 5-methylhexanoate
MOL010768	KYNA
MOL010767	p-Toluyl chloride
MOL010766	3-METHYLPHENANTHRENE
MOL010765	3-methyl-6-(1-methylethyl-idene)-cyclohexene
MOL010764	2-Methyl-1-naphthol
MOL010763	3-methylhexa-2,4-diene
MOL010762	3,8-menthadiene
MOL010761	3,7-dimethyl-cyclopenta cyclooctene
MOL010760	2-ethylidene-1,1-dimethyl-cyclopentane
MOL010759	C2H5CH=CHCOOH
MOL010758	3,7,1,5-tetramethyl-2-Hexadecen-1-ol
MOL010757	Tiglaldehyde
MOL010756	2-methyl-butanol-1-ol
MOL010755	3,3,6,9,9,10-hexamethyl-1-decene
MOL010754	Ethyltrimethylethylene
MOL010753	(2R)-1-ethoxypropan-2-ol
MOL010752	p-Nitrosotoluene
MOL010751	2-octyldodecan-1-ol
MOL010750	1Ph5SHTetrazol
MOL010749	2,5-Dimethylpyrazole
MOL010748	1,3,4-trimethyl-3-cyclohexene-1-carboxaldehyde
MOL010747	(2S)-heptane-1,2-diol
MOL010746	1,2,3-trimethylcyclohexane
MOL010745	(E)-oct-3-en-1-yne
MOL010744	2-Methylpent-2-en-1-ol
MOL010743	19889-94-2
MOL010742	2,3,4-Trimethyl-5-phenyloxazolidine
MOL010735	(2S,4S)-4-methyl-2-(2-methylprop-1-enyl)oxane
MOL010551	DMEP
MOL010259	Apple oil
MOL005019	(2R)-7-hydroxy-2-[4-hydroxy-3-(3-methylbut-2-enyl)phenyl]chroman-4-one
MOL005014	Licorice glycoside A
MOL005011	Kanzonol Z
MOL005010	Kanzonol E
MOL005009	Corylifolinin
MOL005006	Glyasperins K
MOL005005	Glyasperin A
MOL005004	Gancaonin I
MOL005002	beta-Glycyrrhetinic acid
MOL004999	Artonin E
MOL004998	Araboglycyrrhizin_qt
MOL004997	Araboglycyrrhizin
MOL004995	Kanzonol H
MOL004994	12-methyltetradecanoate
MOL004992	7-hydroxy-2-methyl-3-phenyl-chromone
MOL004987	11-deoxyglycyrrhetic acid
MOL004986	6″-O-acetylliquiritin
MOL005015	Licoriisoflavan A
MOL004983	5,6,7,8-Tetrahydro-4-methylquinoline
MOL004982	2,6,10-trimethyl-dodecane
MOL004981	1-(5-hydroxy-2,2-dimethylchromen-6-yl)-3-(4-hydroxyphenyl)prop-2-en-1-one
MOL004979	4,2',4',alpha-Tetrahydroxydihydrochalcone
MOL004977	1-Methoxyficifolinol
MOL004976	Daidzein dimethyl ether
MOL004975	3β-formylglabrolide
MOL004973	3-Ethylpentane
MOL004972	3-Methylpentane
MOL004971	3-methylhexane
MOL004970	3-methylheptane
MOL004969	2-Ethyl-p-xylene
MOL004968	3,4,3',4'-Tetrahydroxy-2-methoxychalcone
MOL004967	3,3-Dimethylpentane
MOL004965	3'(γ,γ-dimethylallyl)-kievitone
MOL004964	(Z)-1-(2,4-dihydroxyphenyl)-3-phenylprop-2-en-1-one
MOL004963	24-Hydroxyglycyrrhetic acid
MOL004962	24-Hydroxy-11-deoxyglycyrrhetic acid
MOL004960	22β-acetylglabric acid
MOL004958	Isoschaftoside
MOL004956	Isoononin
MOL004955	isoglabrolide
MOL004954	isograbrol
MOL004952	licuraside
MOL004950	isoglycycoumarin
MOL004947	Isoviolanthin
MOL004946	2-Tetradecanone
MOL004944	Cyclobutanol, 1-ethyl-
MOL004943	neoisoliquiritin
MOL004942	(E)-dodec-2-ene
MOL004940	neoliquiritin
MOL004939	Nortangeretin
MOL004938	schaftoside
MOL004937	uralenneoside
MOL004936	Uralene
MOL004934	Isohexane
MOL004931	Uralenol-3-methylether
MOL004930	Uralenol
MOL004929	Pentadecanol
MOL004928	violanthin
MOL004927	Hispaglabridin A
MOL004926	4H-1-Benzopyran-4-one, 2-(4-(beta-D-glucopyranosyloxy)phenyl)-2,3-dihydro-5,7-dihydroxy-, (2S)-
MOL004925	vitexin
MOL004924	(-)-Medicocarpin
MOL000391	Ononin
MOL004922	2-methyl-6-ethyl decane
MOL004921	Docosyl caffeate
MOL004920	Methylcyclopentane
MOL004919	Sextone B
MOL004918	HEX
MOL004917	glycyroside
MOL004916	2-methyl-5-propyl -nonane
MOL004909	glabrolide
MOL004906	Hispaglabridin B
MOL004902	glycyrrhetol
MOL004901	licorice-saponin K2_qt
MOL004900	licorice-saponin K2
MOL004899	licorice-saponin B2
MOL004897	licorice-saponin J2_qt
MOL004896	licorice-saponin J2
MOL004895	licorice-saponin H2_qt
MOL004894	licorice-saponin H2
MOL004893	licorice-saponin G2_qt
MOL004890	(4S)-2,4-dimethylhexane
MOL004889	licorice-saponin F3_qt
MOL004888	licorice-saponin F3
MOL004887	licorice-saponin C2_qt
MOL004886	licorice-saponin C2
MOL004881	(E)-1-[2,4-dihydroxy-3-(3-methylbut-2-enyl)phenyl]-3-(2,4-dihydroxyphenyl)prop-2-en-1-one
MOL004880	5,6,7,8-Tetrahydro-2,4-dimethylquinoline
MOL004878	Glycycoumarin
MOL004877	Licoricidin
MOL004875	3-[4,6-dihydroxy-2-methoxy-3-(3-methylbut-2-enyl)phenyl]-7-hydroxy-chromone
MOL004874	Gancaonin V
MOL004873	Gancaonin U
MOL004872	gancaonin T
MOL004871	(3S)-2,3-dimethylpentane
MOL004870	Gancaonin S
MOL004869	Gancaonin R
MOL004868	Gancaonin Q
MOL004867	Gancaonin P
MOL004865	5,7-dihydroxy-3-(2-hydroxy-4-methoxy-phenyl)-6-(3-methylbut-2-enyl)chromone
MOL004862	(2R)-2-[3,4-dihydroxy-5-(3-methylbut-2-enyl)phenyl]-5,7-dihydroxy-8-(3-methylbut-2-enyl)chroman-4-one
MOL004861	Gancaonin D
MOL004860	licorice glycoside E
MOL000486	Prunetin
MOL004859	2,3-dimethylhexane
MOL004858	Gancaonin C
MOL004385	Yinyanghuo D
MOL004853	Licoflavonol
MOL004852	7-hydroxy-2-[4-hydroxy-3-(3-methylbut-2-enyl)phenyl]-6-(3-methylbut-2-enyl)chromone
MOL004851	Licoflavone
MOL004850	liquoric acid
MOL004847	2,2-DIMETHYLPENTANE
MOL004846	apioglycyrrhizin_qt
MOL004845	apioglycyrrhizin
MOL004844	glabrol
MOL004843	licochalconeD
MOL004842	licochalcone C
MOL004840	Liconeolignan
MOL004839	(1S,2S)-1,2-dimethylcyclopentane
MOL004837	Karenzu DK2
MOL004834	3-(2-hydroxy-4-methoxyphenyl)-2H-chromen-7-ol
MOL004831	(E)-1-[2,4-dihydroxy-3-(3-methylbut-2-enyl)phenyl]-3-[4-hydroxy-3-(3-methylbut-2-enyl)phenyl]prop-2-en-1-one
MOL004830	Octadiene
MOL005812	naringin
MOL004825	glyinflanin A
MOL004823	licoagropin
MOL004822	(E)-1-(2,4-dihydroxyphenyl)-3-[4-hydroxy-3-(3-methylbut-2-enyl)phenyl]prop-2-en-1-one
MOL004821	kanzonols X
MOL004819	kanzonols T
MOL004818	kanzonols L
MOL004817	kanzonols K
MOL004816	(2R)-1-[2,4-dihydroxy-5-(3-methylbut-2-enyl)phenyl]-2-hydroxy-3-[4-hydroxy-3-(3-methylbut-2-enyl)phenyl]propan-1-one
MOL004813	glyasperins Z
MOL004812	glyasperins D
MOL004809	glyasperin E
MOL004807	glucuronic acid
MOL004804	18beta-glycyrrhetinic acid
MOL004803	3-Hydroxyglabrol
MOL004802	(E)-1-butoxyhex-2-ene
MOL004801	2',7-Dihydroxy-4'-methoxyisoflavan-7-O-β-d-glucopyranoside
MOL000475	anethole
MOL004723	beta-Terpinene
MOL000467	Castanin
MOL004589	Methylheptane
MOL000445	8-Prenylwighteone
MOL000437	Hirsutrin
MOL003985	2-Caren-10-al
MOL003686	Narcissoside
MOL003662	7,4'-Dihydroxyflavone
MOL003218	Neouralenol
MOL002943	BuOH
MOL002693	nicotiflorin
MOL002678	EB
MOL002547	21987_FLUKA
MOL001850	Izoforon
MOL001737	ICO
MOL001696	Morusin
MOL001599	α-cubebol
MOL001543	Vicenin-2
MOL001099	p-xylene
MOL001098	m-xylene
MOL001097	o-xylene
MOL008707	Ethylisobutyrate
MOL007465	10-Methylnonadecane
MOL001219	Satol
MOL000876	(6R,10R)-6,10,14-trimethylpentadecan-2-one
MOL000775	EEE
MOL000551	Hederagenol
MOL000513	3,4,5-trihydroxybenzoic acid
MOL000263	oleanolic acid
MOL001937	24253-30-3
MOL001936	cis-5-Octen-1-ol
MOL001935	(3aR,6S,7aR)-6-hydroxy-6-methyl-3-methylene-3a,4,7,7a-tetrahydrobenzofuran-2,5-dione
MOL001934	(3R,3aR,6S,7aR)-6-hydroxy-3,6-dimethyl-3a,4,7,7a-tetrahydro-3H-benzofuran-2,5-dione
MOL001933	oxypaeoniflorin
MOL001931	4-Chlorobutyric acid
MOL001929	alexandrin
MOL001928	albiflorin_qt
MOL001926	1,2,3,6-tetra-O-galloylglucose
MOL001923	[(3S,3aR,6S,7aR)-6-hydroxy-6-methyl-2,5-dioxo-3a,4,7,7a-tetrahydro-3H-benzofuran-3-yl]methyl benzoate
MOL001922	2-Hexyl-1-decanol
MOL001921	Lactiflorin
MOL001917	(3S,3aR,5S,6S,7aR)-5,6-dihydroxy-3,6-dimethyl-3,3a,4,5,7,7a-hexahydrobenzofuran-2-one
MOL000561	Astragalin
MOL001915	paeonoside
MOL001914	gallotannin
MOL001913	propyl (2R)-2-hydroxypropanoate
MOL001912	albiflorin R1_qt
MOL001911	albiflorin R1
MOL001909	(Z)-(1S,5R)-beta-pinen-10-yl-beta-vicianoside_qt
MOL001908	(Z)-(1S,5R)-beta-pinen-10-yl-beta-vicianoside
MOL001907	Progallin A
MOL001906	Methylgallate
MOL001905	3β-hydroxy-oleana-11,13(18)-dien-28-oic acid?
MOL001904	2 - methyl - 3 - (2 - propenyl) - phenol
MOL001903	3β-hydroxy-11-oxo-olean-12-en-28-oic acid
MOL001902	3β,23-dihydroxy-oleana-11,13(18)-dien-28-oic acid
MOL001901	24-Methylenecycloartanol
MOL001900	Pulchinenoside A_qt
MOL001898	Acetyl oxide
MOL001897	()-trans-Myrtanol
MOL001896	bicyclo[3.1.1]hept-2-ene-2-methanol, 6,6-dimethyl-
MOL001895	Dibutylphenol
MOL001893	BU3
MOL001892	Dipropyl phthalate
MOL001891	9-methylenefluorene
MOL001890	octadec-9-ene
MOL001888	2,2-dimethylcyclohexanol
MOL001801	salicylic acid
MOL001644	Dodecanal
MOL001246	(1R)-()-Nopinone
MOL000106	PYG
MOL012676	protopanaxadiol
MOL012667	ginsenoside-Rh3
MOL012644	caryophellene
MOL000749	Linoleic
MOL000628	darutoside
MOL005404	p-Glucosyloxymandelonitrile
MOL005403	oleanane
MOL005400	ginsenoside Rg5
MOL005398	alexandrin
MOL005397	Dammarane
MOL005396	cis-Widdrol alpha-epoxide
MOL005394	(Z)-2-methyl-5-[(1S,2R,4R)-2-methyl-3-methylene-2-norbornanyl]pent-2-en-1-ol
MOL005392	alpha-Guttiferin
MOL005391	(Z,Z)-alpha-farnesene
MOL005390	3-[[(2S)-2,4-dihydroxy-3,3-dimethylbutanoyl]amino]propanoic acid
MOL005389	PANGAMIC ACID
MOL005388	Undecane, 3,6-dimethyl
MOL006651	Trifolirhizin
MOL005385	Suffruticoside A_qt1
MOL005383	Methylselenocysteine
MOL005382	Ramalic acid
MOL005381	2-Formylpyrrole
MOL005380	Pandamine
MOL005379	Pancratistatin
MOL005378	Panaxytriol
MOL007500	panaxatriol
MOL005375	Stearyl acetate
MOL005374	Notoginsenoside R6
MOL005373	notoginsenoside R2_qt
MOL005372	notoginsenoside R2
MOL005371	Nonacosanediol-6,8
MOL005370	NN-Dimethyldecanamide
MOL005369	Mycosinol
MOL005367	GUP
MOL005366	Malvic acid
MOL005365	MAL
MOL005364	Malonylginsenoside Rd_qt
MOL005363	Malonylginsenoside Rd
MOL005362	Malonylginsenoside Rc_qt1
MOL005361	Malonylginsenoside Rc
MOL005359	D-erythro-Isocitric acid
MOL005358	L-erythro-isocitric acid
MOL005355	Ginsenoyne E
MOL005354	Ginsenoyne D
MOL005353	Ginsenoyne C
MOL005352	Ginsenoyne B
MOL005351	Ginsenoyne A
MOL005350	Ginsenoside-Rs2
MOL005349	Ginsenoside-Rs1
MOL005347	Ginsenoside-Rh4
MOL005346	Ginsenoside-Rh3_qt
MOL005345	(2R,3S,4S,5R,6R)-2-(hydroxymethyl)-6-[[(3S,5R,8R,9R,10R,12R,13R,14R,17S)-12-hydroxy-4,4,8,10,14-pentamethyl-17-[(2Z)-6-methylhepta-2,5-dien-2-yl]-2,3,5,6,7,9,11,12,13,15,16,17-dodecahydro-1H-cyclopenta[a]phenanthren-3-yl]oxy]oxane-3,4,5-triol
MOL005343	Ginsenoside-Rg3_qt
MOL005341	Sanchinoside C1
MOL005340	(3S,5R,6S,8R,9R,10R,12R,13R,14R,17S)-17-[(2R)-2-hydroxy-6-methylhept-5-en-2-yl]-4,4,8,10,14-pentamethyl-2,3,5,6,7,9,11,12,13,15,16,17-dodecahydro-1H-cyclopenta[a]phenanthrene-3,6,12-triol
MOL005337	(2S,3R,4S,5S,6R)-2-[(2S)-2-[(3S,5R,8R,9R,10R,12R,13R,14R,17S)-3-[(2R,3R,4S,5S,6R)-4,5-dihydroxy-6-(hydroxymethyl)-3-[(2S,3R,4S,5S,6R)-3,4,5-trihydroxy-6-(hydroxymethyl)oxan-2-yl]oxyoxan-2-yl]oxy-12-hydroxy-4,4,8,10,14-pentamethyl-2,3,5,6,7,9,11,12,13,15,1
MOL005335	Gypenoside LXIX
MOL005334	(3S,5R,8R,9R,10R,12R,13R,14R,17S)-17-[(2S)-2-hydroxy-6-methylhept-5-en-2-yl]-4,4,8,10,14-pentamethyl-2,3,5,6,7,9,11,12,13,15,16,17-dodecahydro-1H-cyclopenta[a]phenanthrene-3,12-diol
MOL005332	(3R,5R,8R,9R,10R,12R,13R,14R,17S)-17-[(2S)-2-hydroxy-6-methylhept-5-en-2-yl]-4,4,8,10,14-pentamethyl-2,3,5,6,7,9,11,12,13,15,16,17-dodecahydro-1H-cyclopenta[a]phenanthrene-3,12-diol
MOL005330	Ginsenoside-Ra3
MOL005329	Ginsenoside-Ra2
MOL005328	Ginsenoside-Ra1
MOL005327	Gypnoside V_qt
MOL005326	Ginsenoside-Ra0
MOL005324	ginsenoside La_qt
MOL005323	ginsenoside La
MOL005322	Gamma-Selinene
MOL005319	Ditertbutyl phthalate
MOL005316	MAV
MOL005315	(R)-()-Citronellal
MOL005313	5-[(3aS,6R,6aR)-2-keto-1,3,3a,4,6,6a-hexahydrothieno[3,4-d]imidazol-6-yl]valeric acid
MOL005312	Argininyl-fructosyl-glucose_qt
MOL005311	Argininyl-fructosyl-glucose
MOL005310	(4aS,6aR,6aS,6bR,8aR,10S,12aR,14bR)-10-hydroxy-2,2,6a,6b,9,9,12a-heptamethyl-1,3,4,5,6,6a,7,8,8a,10,11,12,13,14b-tetradecahydropicene-4a-carboxylic acid
MOL005309	Araloside A
MOL005307	Adenosine triphosphate
MOL005306	Acetal
MOL005305	Nepetin
MOL005304	7alpha-L-Rhamnosyl-6-methoxylutcolin
MOL005303	7-Tetradecyne
MOL005302	7-(beta-Xylosyl)cephalomannine
MOL005301	6'-Malonylginsenoside Rd1_qt1
MOL005300	6'-Malonylginsenoside Rd1
MOL005299	5-methyl-tetradecane
MOL005298	5-heptadec-12-enylresorcinol
MOL005297	5-Isobutylnonane
MOL005296	4-Methyldodecane
MOL005295	3-methylundecane
MOL005294	3-methylheptane
MOL005293	3-Ethyl-3-methylheptane
MOL005292	3-O-beta-D-Glucuronopyranosyl gypsogenin_qt
MOL005291	3-O-beta-D-Glucuronopyranosyl gypsogenin
MOL005290	3,5-Dimethyl-p-anisic acid
MOL005289	3,4-Dimethylheptane
MOL005288	20-(S)-Ginsenoside-Rg3_qt
MOL005287	20-(S)-Ginsenoside-Rg3
MOL005285	20(s)-protopanaxadiol
MOL005284	(3S,5R,6S,8R,9R,10R,12R,13R,14R,17S)-17-[(2S)-2-hydroxy-6-methylhept-5-en-2-yl]-4,4,8,10,14-pentamethyl-2,3,5,6,7,9,11,12,13,15,16,17-dodecahydro-1H-cyclopenta[a]phenanthrene-3,6,12-triol
MOL005283	20(S)-ginsenoside-Rg2
MOL005282	20(S)-Ginsenoside-Rh1_qt
MOL005281	20(S)-Ginsenoside-Rh1
MOL005280	ginsenoside-Rh1_qt
MOL005278	2-METHYLTRIDECANE
MOL005277	2,6,10,15-tetramethylheptadecane
MOL005276	2,3,8-Trimethyldecane
MOL005275	2,3,4-Trimethyldecane
MOL005273	16-Oxoseratenediol
MOL005271	1-HEXADECYNE
MOL005270	n-Heptadecanol
MOL005269	(+)-Maalioxide
MOL005155	ginsenoside Ro_qt
MOL004647	TDA
MOL004498	12-O-Nicotinoylisolineolone
MOL004275	(1R,4E,7E,11R)-1,5,9,9-tetramethyl-12-oxabicyclo[9.1.0]dodeca-4,7-diene
MOL004237	δ-elemene
MOL004174	epsilon-Cadinene
MOL004100	N-Salicylidene-salicylamine
MOL003902	methyl (Z)-icos-11-enoate
MOL003845	Folinic acid
MOL000036	beta-caryophyllene
MOL003346	Psuedohypericin
MOL000269	Elemicin
MOL002669	Campesteryl ferulate
MOL002377	Kaempferol-3-arabofuranoside
MOL002323	L-Adenosine
MOL002312	[(3S,4R,5R)-5-[[(2R,3S,4S,5R,6S)-6-(2-acetyl-5-methoxyphenoxy)-3,4,5-trihydroxyoxan-2-yl]methoxy]-3,4-dihydroxyoxolan-3-yl]methyl 3,4,5-trihydroxybenzoate
MOL002307	20-Hexadecanoylingenol
MOL001965	Dauricine (8CI)
MOL001738	MLI
MOL001706	2,6-dimethyl-3,7-octadiene-2,6-diol
MOL001312	9-HEXADECENOIC ACID
MOL001218	Pisol
MOL001212	Loxanol V
MOL013176	2-[(2S)-7-oxo-2,3-dihydrofuro[4,5-g]chromen-2-yl]propan-2-yl (E)-2-methylbut-2-enoate
MOL012462	2-Octenal, 2-butyl-
MOL011860	d-Dihydrocarvone
MOL011648	METHYL 10-OCTADECENOATE
MOL010705	2-Decenol
MOL010244	(2S)-Flavanone
MOL009356	Tectochrysin
MOL008743	1-Tridecyne
MOL007545	lanceol
MOL005786	Byakangelicin
MOL005723	Phytodolor
MOL005274	Neohexane
MOL004783	nonane
MOL004775	Isobergapten
MOL004687	2-octanone
MOL004667	fraxetin
MOL004294	Perillen
MOL004284	2-Nonadecanone
MOL003951	Benzyl isovalerate
MOL003561	isopimpinellin
MOL003547	Azaron
MOL003493	naphthalene
MOL003453	ZINC02571348
MOL003040	Amylol
MOL002520	.beta.-Fenchyl acetate, exo-
MOL002480	Methylbutenol
MOL002033	cis-Thujopsene
MOL002024	(1S,4R)-1,7,7-trimethylbicyclo[2.2.1]hept-2-ene
MOL001949	panaxynol
MOL001863	METHYL ISOPALMITATE
MOL001640	NON
MOL001487	FITONE
MOL001396	PENTADECYLIC ACID
MOL001227	Decyl acetate
MOL001121	19894-97-4
MOL001114	2-[(1R)-2,2,3-trimethyl-1-cyclopent-3-enyl]ethanal
MOL001110	cis-beta-Ocimene
MOL000974	cuminal
MOL000724	Geranylacetone
MOL000716	trans-2-nonenal
MOL000661	PENTACOSANOIC ACID
MOL000614	osthol
MOL000602	FUM
MOL000162	beta-Chamigrene
MOL000129	Acetate C-8
MOL000115	Undecenal
MOL007502	NSC692928
MOL000040	Scopoletol
MOL000373	(2S)-4-methoxy-7-methyl-2-[1-methyl-1-[(2S,3R,4S,5S,6R)-3,4,5-trihydroxy-6-methylol-tetrahydropyran-2-yl]oxy-ethyl]-2,3-dihydrofuro[3,2-g]chromen-5-one
MOL000003	MTL
MOL002029	()-Cuparene
MOL001940	Falcarindiol
MOL001953	Uvadex
MOL011756	7-octen-4-ol
MOL011755	5-methoxy-8-hydroxypsoralen
MOL011754	4-hydroxy-9-methoxyfuro[3,2-g]chromen-7-one
MOL011752	sec-o-beta-d-glucosylhamaudol
MOL001950	psoralen
MOL011750	prim-o-beta-d-glucosylcimifugin
MOL011748	nodakenetin
MOL011746	isopimpinellin
MOL011745	isofraxidin
MOL011743	hamaudol
MOL011742	fraxidin
MOL011741	fangfengalpyrimidine
MOL011739	divaricataester,b
MOL011738	divaricataester,a
MOL011736	3'-O-angeloylhamaudol
MOL011735	deltoin
MOL011731	3'-O-Acetylhamaudol
MOL011729	11-hydroxy-sec-o-beta-d-glucosylhamaudol
MOL011387	heptadeca-1,8-dien-4,6-diyn-3,10-diol
MOL013161	METHYL HEXACOSANOATE
MOL013062	BZQ
MOL012564	3,7-dimethylnonane
MOL012267	Scutevulin
MOL012240	2',3',5,7-tetrahydroxyflavone
MOL011322	Diisobutyl succinate
MOL011081	Linolenic acid methyl ester
MOL010563	Methyl (Z)-cinnamate
MOL010206	Methyl isoheptadecanoate
MOL009734	Methyl lignocerate
MOL009730	methyl icos-11-enoate
MOL009520	3,8-dimethylundecane
MOL008615	Methyl 9-oxononanoate
MOL008595	methyl henicosanoate
MOL008151	METHYL NONADECANOATE
MOL007792	Isomartynoside
MOL007197	DFA
MOL006370	5-o-caffeoylquinic acid
MOL006312	Azulol
MOL006219	Clorius
MOL005841	TBP
MOL005402	Methyl margarate
MOL005368	Methyl tricosanoate
MOL005272	13-Tetradecenyl acetate
MOL005224	TETRATETRACONTANE
MOL005021	Mipax
MOL004684	methyl (E)-octadec-2-enoate
MOL004682	Methyl octylate
MOL004464	MEHQ
MOL003920	Methyl icosanoate
MOL003568	Patchoulene
MOL003535	1,1,6-trimethyl-2H-naphthalene
MOL003475	9-Cedranone
MOL003055	heptadecyloxirane
MOL003050	nonanoic acid
MOL002819	catalpol
MOL002378	UND
MOL002027	Methyl behenate
MOL001889	Methyl linolelaidate
MOL001818	Methyl palmitelaidate
MOL001578	Hypnon
MOL001392	Methyl myristate
MOL001386	Methyl laurate
MOL001132	longipinene
MOL000885	Dodekan
MOL000870	HEXATRIACONTANE
MOL000789	jatrorrizine
MOL000717	d-isomenthone
MOL000714	Hyacinthin
MOL000669	(S)-camphor
MOL000654	Methyl montanate
MOL000709	(S)-Matsutake alcohol
MOL000007	Cosmetin
MOL000458	campesterol
MOL000396	(+)-Syringaresinol
MOL002936	5,8-Dihydroxy-6,7-dimethoxyflavone
MOL002930	Tyrosol
MOL002929	salidroside
MOL002924	darendoside B_qt
MOL002923	darendoside B
MOL002922	5-(2-hydroxyethyl)-2-methoxyphenol
MOL002921	(2S,3R,4R,5R,6S)-2-[(2R,3R,4S,5R,6R)-3,5-dihydroxy-2-[2-(3-hydroxy-4-methoxy-phenyl)ethoxy]-6-methylol-tetrahydropyran-4-yl]oxy-6-methyl-tetrahydropyran-3,4,5-triol
MOL002919	Viscidulin III
MOL002918	Ganhuangenin
MOL002916	2-(2,6-dihydroxyphenyl)-3,5,7-trihydroxy-chromone
MOL002912	Dihydrobaicalin
MOL000219	BOX
MOL013068	Oroxindin
MOL001300	PEL
MOL000873	CYH
MOL000794	menisperine
MOL000764	magnoflorine
MOL000695	patchouli alcohol
MOL000671	()-Menthol
MOL002358	Faradiol
MOL002357	ZINC04568391
MOL002356	Dichotomitin
MOL002355	Cycleaneonine
MOL002354	Cissampareine
MOL002353	Curine
MOL002352	Berbamine
MOL002351	3-Hexenol
MOL002349	ZINC05225089
MOL002348	aristolene
MOL002347	(R)-Allantoin
MOL002346	Betaine
MOL002345	Aristololactum
MOL002344	cyclanoline
MOL002342	(+)-Limacine
MOL007930	hesperidin
MOL002339	9-Oxofarnesol
MOL002338	136458-42-9
MOL002337	longipinocarvone
MOL002336	farnesane
MOL002334	Homocresol
MOL002330	TNP00326
MOL002329	Javanicin
MOL002328	Feralolide
MOL002327	Fenfangjine D
MOL002326	2,2,2-triethoxyethanol
MOL000170	guaiene
MOL002508	Gingerenone-C
MOL002507	Gingerenone B
MOL002502	copaene
MOL002490	6-gingediacetate
MOL002488	6-Gingerdione
MOL002470	Isogingerenone-B
MOL001600	copaene
MOL000968	beta-Bisabolene
MOL000913	tricyclene
MOL013268	cis-Pinene hydrate
MOL013263	.alpha.-Myrcene
MOL012774	4-(2,6,6-trimethyl-2-cyclohexen-1-yl)-2-butanone
MOL012590	Neric acid
MOL012439	(1Z,4E,8E)-2,6,6,9-tetramethylcycloundeca-1,4,8-triene
MOL012415	1-cis,5-trans Germacrone
MOL012409	(2R-cis)-1,2,3,4,4a,5,6,7-Octahydro-alpha,alpha,4a,8-tetramethyl-2-naphthalenemethanol
MOL012359	3-Cyclohexen-1-methanol
MOL012344	(4aR,9aS)-2,9,9-trimethyl-5-methylene-4,4a,6,7,8,9a-hexahydro-3H-benzo[7]annulene
MOL011544	ZINC02140511
MOL011310	(1R,3S,5R)-6,6-dimethyl-2-methylene-3-norpinanol
MOL011148	bergamotene (Z,.alpha.,cis)
MOL010947	(Z)-calamenene
MOL010822	ZINC04026824
MOL010597	Myrizylalkohol
MOL010380	()-alpha-Funebrene
MOL010123	ZINC00394787
MOL010120	(1S,4R,4aR,8aR)-1-isopropyl-4,7-dimethyl-2,3,4,5,6,8a-hexahydro-1H-naphthalen-4a-ol
MOL010044	C09628
MOL009549	Ether
MOL009451	.alpha.-Carene
MOL008990	2-[(1R)-4-methyl-1-cyclohex-3-enyl]propan-2-yl acetate
MOL008434	gamma-curcumene
MOL008165	2-Decanone
MOL008134	amylcyclopropane
MOL007948	Limene
MOL007548	(1S,4aS,8aS)-7-isopropyl-1,4a-dimethyl-2,3,4,5,6,8a-hexahydronaphthalen-1-ol
MOL007540	amomumoside_qt
MOL007521	2-ethenyl-1,1-dimethyl-3-methylene-cyclohexane
MOL006292	δ-selinene
MOL005964	β-panasinsene
MOL005926	Geranyl formate
MOL005899	53111-25-4
MOL005752	[(4R)-4-isopropenyl-1-cyclohexenyl]methanol
MOL005743	Proximadiol
MOL005577	undecanal
MOL005534	trans-Verbenol
MOL005078	(3S)-3,7-dimethyloct-6-enoic acid
MOL005075	Rhodinol (6CI)
MOL004832	WLN: 4OVR
MOL004776	.alpha.-cis-bergamotene
MOL004735	CHX
MOL004727	(1R,4aR,8aS)-1-isopropyl-7-methyl-4-methylene-2,3,4a,5,6,8a-hexahydro-1H-naphthalene
MOL004717	(3R,4aR,8aR)-3-isopropenyl-5,8a-dimethyl-2,3,4,4a,7,8-hexahydro-1H-naphthalene
MOL004713	alpha-Eudesmol
MOL004707	tau-cadinol
MOL004680	cis-p-2-Menthen-1-ol
MOL004671	ISOPULEGOL
MOL004581	[(1R,5S)-7,7-dimethyl-4-bicyclo[3.1.1]hept-3-enyl]methyl acetate
MOL004480	acetic acid
MOL004419	globulol
MOL004266	ethyl (Z)-3-(4-methoxyphenyl)prop-2-enoate
MOL004031	(6S)-1-isopropyl-3-isopropylidene-6-methyl-6-vinylcyclohexene
MOL003984	2,6-dimethylocta-2,6-diene
MOL003978	(3R,6E,10E)-3,7,11,15-tetramethylhexadeca-1,6,10,14-tetraen-3-ol
MOL003937	Naphthalene, 1,2,3,4,4a,5,6,8a-octahydro-7-methyl-4-methylene-1-(1-methylethyl)-, (1alpha,4abeta,8aalpha)-
MOL003595	cis-p-2,8-Menthadien-1-ol
MOL003575	α-Panasinsene
MOL003545	aristolene
MOL003537	T-Muurolol
MOL003536	T-Cadinol
MOL003480	Diepicedrene-1-oxide
MOL003443	2-Decenal
MOL003393	(1S,4S)-7-isopropylidene-1,4-dimethyl-2,3,4,5,6,8-hexahydro-1H-azulene
MOL003358	Euxanthone
MOL003126	alpha cadinene
MOL002854	(1R,2R,4R)-Dihydrocarveol
MOL002829	trans-p-2-Menthen-1-ol
MOL002778	THZ
MOL002624	Paradol
MOL002573	β-patchoulene
MOL002528	2,5-Dibutylfuran
MOL002527	1,2-Dihydrocurcumin
MOL002526	3691-11-0
MOL002513	Xanthorrhizol
MOL002506	Gingerenone A
MOL002504	Peruviol
MOL002497	(8)-Gingerol
MOL002493	6-gingediol
MOL002484	Isovaleral
MOL002482	()-beta-Citronellene
MOL002478	(2R)-heptan-2-ol
MOL002475	himachalene
MOL002472	Neryl propionate
MOL002468	hexahydrocurcumin
MOL002459	(S)-5-Hydroxy-1-(4-hydroxy-3-methoxyphenyl)-3-tetradecanone
MOL002455	[(3S)-3,7-dimethyloct-6-enyl] acetate
MOL002453	(-)-Comphene
MOL002379	PTL
MOL002335	beta-Gurjunene
MOL002092	Antioxidant No. 33
MOL002046	hexanoic acid
MOL002031	toluene
MOL002002	cis-Carveol
MOL001945	Majudin
MOL001867	Isovanillin
MOL001843	HBA
MOL001772	Dihydro-beta-ionone
MOL001732	IFP
MOL001608	delta-elemene
MOL001606	BB_NC-0668
MOL001602	1,4-cadinadiene
MOL001417	OCTENAL
MOL001304	2-ACETYLPYRROLE
MOL001245	(1S,5R)-7,7-dimethyl-4-bicyclo[3.1.1]hept-3-enecarboxaldehyde
MOL001211	cis-lanceol
MOL001191	(4aR,8aR)-3-isopropylidene-5,8a-dimethyl-1,2,4,4a,7,8-hexahydronaphthalene
MOL001180	γ-muurolene
MOL001179	(&#8722;)-Alloaromadendrene
MOL001168	(1S,2S)-2-isopropenyl-4-isopropylidene-1-methyl-1-vinylcyclohexane
MOL001129	l-Verbenone
MOL001123	muurolene
MOL001109	β-thujene
MOL001015	ZINC00388662
MOL000980	(4S)-4-[(1Z)-1,5-dimethylhexa-1,4-dienyl]-1-methylcyclohexene
MOL000943	epi-10- .gamma.-Eudesmol
MOL000942	(1R,4S,4aR,8aR)-4-isopropyl-1,6-dimethyl-3,4,4a,7,8,8a-hexahydro-2H-naphthalen-1-ol
MOL000938	calarene
MOL000936	Germacrene B
MOL000935	Hepanal
MOL000926	cis-beta-farnesene
MOL000916	Car-3-ene
MOL000914	(5S)-1-isopropyl-4-methylbicyclo[3.1.0]hex-3-ene
MOL000910	Germacron
MOL000905	()-beta-Pinene
MOL000899	Furanodiene
MOL000875	Cedrol
MOL000776	OXA
MOL000715	l-Menthone
MOL000703	2-heptanone
MOL000700	Nerol
MOL000699	m-Cymol
MOL000674	Farnesol acetate
MOL000663	lignoceric acid
MOL000615	delta-amorphene
MOL000611	beta-Bourbonene
MOL000607	Dehydro-p-cymene
MOL000597	Neryl acetate
MOL000485	TMH
MOL000479	Farnesene
MOL000474	(-)-Epoxycaryophyllene
MOL000303	caprylic acid
MOL000271	l-carvone
MOL000259	o-Thymol
MOL000257	(-)-beta-Phellandrene
MOL000253	Styrene, 3,4-dimethyl-
MOL000252	farnesol
MOL000249	Methylcinnamate
MOL000209	(1R,3aR,4R,7R)-7-isopropenyl-1,4-dimethyl-1,2,3,3a,4,5,6,7-octahydroazulene
MOL000171	Guaiol
MOL000169	alpha-Guaiene
MOL000130	CAM
MOL000128	NERYLACETATE
MOL000121	Decanal
MOL000037	γ-elemene
MOL000032	beta-Eudesmol
MOL000029	beta-Humulene
MOL000025	α-Longipinene
MOL000023	Hemo-sol
MOL000018	(+/-)-Isoborneol
MOL000924	Mnk
MOL000920	LINALOOL (D)
MOL000918	2-NONANONE
MOL000912	(2S)-heptan-2-ol
MOL000895	Zingiberene
MOL000774	(-)-Citronellal
MOL000066	alloaromadedrene
MOL006133	(E)-1-(4-hydroxy-3-methoxyphenyl)dodec-4-en-3-one
MOL006132	[5]-gingerol
MOL006130	8-gingerdione
MOL006128	gingerglycolipid)A
MOL006127	6-Dehydrogingerdione
MOL006126	Hexahydrocurcumin
MOL006125	Gingerdione
MOL006124	elemol
MOL006123	zingiberol
MOL006122	HEPTENE
MOL006121	Dimethyldiethoxysilane
MOL006120	8-Gingerol
MOL006119	2-methyltridec-1-ene
MOL005554	i-Butanol
MOL005151	[(3S)-3,7-dimethylocta-1,6-dien-3-yl] acetate
MOL003993	TRIDECANONE
MOL003962	Geranyl propionate
MOL002972	(4S)-1-methyl-4-(6-methylhepta-1,5-dien-2-yl)cyclohexene
MOL000267	beta-Citronellol
MOL002522	beta-Rhodinol
MOL002496	Sulcatone
MOL002494	6-gingesulfonic acid
MOL002483	1-(4-Hydroxy-3-methoxyphenyl)decan-5-one
MOL002465	9-Octadecenoic acid (Z)-, 3-((6-O-alpha-D-galactopyranosyl-beta-D-galactopyranosyl)oxy)-2-hydroxypropyl ester, (S)-
MOL000206	isoeugenol
MOL000166	ZINC01609418
MOL001566	calarene
MOL000127	Neral
MOL001254	(S)-p-Mentha-1,8-dien-7-al
MOL000124	citral
MOL001217	()-Bornyl acetate
MOL000119	ZINC02040970
MOL002438	Delbrusine
MOL002437	Delbruline
MOL002436	Delavaconitine
MOL002435	STOCK1N-53073
MOL002433	(3R,8S,9R,10R,13R,14S,17R)-3-hydroxy-4,4,9,13,14-pentamethyl-17-[(E,2R)-6-methyl-7-[(2R,3R,4S,5S,6R)-3,4,5-trihydroxy-6-[[(2R,3R,4S,5S,6R)-3,4,5-trihydroxy-6-(hydroxymethyl)oxan-2-yl]oxymethyl]oxan-2-yl]oxyhept-5-en-2-yl]-1,2,3,7,8,10,12,15,16,17-decahydr
MOL002432	talatizamine
MOL002431	songorine
MOL002429	Pyrrolezanthine
MOL002428	UNAL
MOL002427	Zoba 3GA
MOL002426	neoline
MOL002425	Zoba EG
MOL002423	jesaconitine
MOL002420	hokbusine A
MOL002418	hetisine
MOL002417	fuzitine
MOL002414	denudatine
MOL002413	coryneine
MOL002412	chasmanine
MOL002411	chasmaconitine
MOL002407	beiwutine
MOL002406	2,7-Dideacetyl-2,7-dibenzoyl-taxayunnanine F
MOL002405	Tamarixinol
MOL002404	Senbusine C
MOL002403	Senbusine B
MOL002402	Senbusine A
MOL002400	Neojiangyouaconitine
MOL002399	TMPEA
MOL002396	14-acetyltalatisamine
MOL002394	Demethyldelavaine B
MOL002393	Demethyldelavaine A
MOL002391	Deltamine
MOL002390	Delsoline
MOL002389	Delsemine B
MOL002387	Delphin
MOL002386	Delphamine
MOL002385	Delcorine
MOL002384	14-Deoxy-11,12-didehydroandrographolide
MOL002383	13-Deoxo-13 alpha-acetyloxy-1-deoxynortaxine I
MOL007745	WLN: QVR BVQ
MOL007330	MENTHOL
MOL005386	Vulgarin
MOL004876	Glycyram
MOL003509	Nonanol
MOL002332	STOCK1N-53032
MOL001972	Pulegone
MOL001556	Isocaryophyllene
MOL001285	octanol
MOL000511	ursolic acid
MOL000254	eugenol
MOL000244	()-Borneol
MOL009727	LEVA
MOL000880	Tricosane
MOL000869	Henicosane
MOL000868	LFA
MOL000867	Heptadekan
MOL000865	hexadecane
MOL008236	Tritriacontane
MOL008159	TRIACONTANE
MOL007511	(5S)-5-ethyloxolan-2-one
MOL000723	trans-2,4-decadienal
MOL000708	WLN: VHR
MOL000707	Heptenal
MOL000676	DBP
MOL000667	1-hexanol
MOL006221	prunasin
MOL006180	Tetratriacontane
MOL000610	TRD
MOL005973	pristane
MOL005570	inositol
MOL005521	phytane
MOL000514	Nonacosane
MOL004725	(5S)-5-hexyloxolan-2-one
MOL000432	linolenic acid
MOL000399	Docosanoate
MOL003304	Hentriacontan
MOL000305	lauric acid
MOL002850	butylated hydroxytoluene
MOL002675	Hexenal
MOL000256	Olein
MOL002376	PENTACOSANE
MOL002363	beta-Ionone
MOL002229	HEPTACOSANE
MOL000222	terephthaldehyde
MOL001955	Heriguard
MOL001899	ZINC02169908
MOL001894	Bicetyl
MOL001817	Methyl stearate
MOL001747	Tetracosane
MOL001619	UPL
MOL001501	Daturic acid
MOL001442	phytol
MOL001404	Pentatriacontane
MOL001402	Octacosane
MOL001401	HEXACOSANE
MOL001399	TWT
MOL001394	Oktadekan
MOL001393	myristic acid
MOL001366	MNN
MOL001321	d-mandelonitrile
MOL000123	geraniol
MOL000120	dec-2-enal
MOL000012	Arachic acid
MOL010927	2-undecenoic acid
MOL010926	2-Hydroxy-hexadecanoic acid
MOL010925	Isooleic acid
MOL010924	[CHN]
MOL010923	11-docosenoic acid
MOL010920	6-Oxooctanoic acid
MOL010919	17-beta-estradiol
MOL010918	Aseanostatin P1
MOL010610	2-Hexenol
MOL000971	Ethylpalmitate
MOL000937	58870_FLUKA
MOL000933	.gamma.-Bisabolene
MOL000932	alpha-Farnesene
MOL000922	(R)-p-Menth-1-en-4-ol
MOL000911	Terpilene
MOL000908	beta-elemene
MOL000886	tetradecane
MOL000879	methyl palmitate
MOL000864	MYS
MOL000860	stearic acid
MOL000842	sucrose
MOL000712	o-Cymol
MOL000710	OYA
MOL000705	WLN: VH6
MOL000698	(R)-(-)-alpha-Phellandrene
MOL000069	palmitic acid
MOL000668	PENTYLFURAN
MOL000666	hexanal
MOL000608	()-Terpinen-4-ol
MOL000433	FA
MOL000357	Sitogluside
MOL000035	beta-Selinene
MOL000034	2-[(1R,3S,4S)-3-isopropenyl-4-methyl-4-vinylcyclohexyl]propan-2-ol
MOL000302	Undekansaeure
MOL000270	CHEBI:7
MOL000027	alpha-Curcumene
MOL000268	(1S,5S)-1-isopropyl-4-methylenebicyclo[3.1.0]hexane
MOL000264	Tereben
MOL000024	alpha-humulene
MOL000234	L-Limonen
MOL002210	(3Z,6S,7S)-3-butylidene-6,7-dihydroxy-4,5,6,7-tetrahydroisobenzofuran-1-one
MOL002209	Senkyunolide G
MOL002207	1(3H)-Isobenzofuranone, 3-butyl-3a,4,5,6-tetrahydro-, cis-(-)-
MOL002206	(2-amylphenyl)methanol
MOL002205	Octatriacontane
MOL002204	506-43-4
MOL002203	Exceparl M-OL
MOL002201	cis-ligustilide
MOL002199	L-valyl-L-valinc-achydride
MOL002198	Heptan
MOL002197	(E,E)-1,3,5-Undecatriene
MOL002196	Hexaphenone
MOL003127	Germacrene D
MOL002194	Decahydro-1,6-bis(methylene)-4-(1-methylethyl)-naphthalene
MOL002193	Cerulignol
MOL002192	Coniferylfcrulate
MOL002191	carotol
MOL002190	Cedrene
MOL002189	dl-3n-butylphthalide
MOL002188	Dimethyl D-malate
MOL002187	Amylbenzene
MOL002186	Aromadendrene oxide 2
MOL002185	7-oxabicyclo-2.2.1-heptane,1-methyl-4-[1-methylethyl]-
MOL002184	(6R)-6-butylcyclohepta-1,4-diene
MOL002183	5-Propyl-2-thiouracil
MOL002182	(-)-spathulenol
MOL002181	4-hydroxy-3-butylphthalide
MOL002180	4-Octanone
MOL002179	4-iodoindoline
MOL002178	4,7-Dihydroxy-3-butylphthalide
MOL002176	Methyl 3-furoate
MOL002175	3-cyclohexen-1-ol
MOL002174	3,4-epoxy-2,2,7,7-tetramethyl-octane
MOL002173	3(S)-3-Butyl-4,5-dihydrophthalide
MOL002172	(5S,6R)-5,6-dimethyltetrahydropyran-2-one
MOL002171	2-Methylbenzoxazol
MOL002170	(4S,6S)-cis-Carveol
MOL002169	2-methyl-5-(1-methylene)-1,3-cyclohexadiene
MOL002168	2-Methyl-1-phenylpropene
MOL002167	WLN: T5OJ BVO1
MOL002166	ISOHEPTANE
MOL002165	methyl 2-pentanoylbenzoate
MOL002164	2,2,3-Trimethylcyclopent-3-ene-1-carboxaldehyde
MOL002163	WLN: 2VR
MOL002162	2-Propionylfuran
MOL002161	1-beta-ethylacrylate-7-aldehyde-beta-carboline
MOL002160	1-terpineol
MOL002159	1-Octanol,2,7-dimethyl-
MOL002158	xiongterpene
MOL002156	TML
MOL002177	trans-Piperitol
MOL002154	trans-2-Nonen-1-ol
MOL002153	1H-Cycloprop(e)azulen-7-ol, decahydro-1,1,7-trimethyl-4-methylene-, (1aR-(1aalpha,4aalpha,7beta,7abeta,7balpha))-
MOL002152	sinapic acid
MOL002150	1-Acetyl-beta-carboline
MOL002149	senkyunolide-S
MOL002148	senkyunolide-L
MOL002147	senkyunolide-J
MOL002146	senkyunolide-F
MOL002145	senkyunolide-E
MOL002144	senkyunolide-D
MOL002143	senkyunolide-C
MOL002142	sedanoic-acid
MOL002141	PLO
MOL002139	APH
MOL002138	p-Cymen-8-ol
MOL002137	OCT
MOL002134	Isobutyrophenone
MOL002133	1,5,5-trimethyl-6-methylenecyclohexene
MOL002132	(2R,4aR)-2-isopropenyl-4a,8-dimethyl-2,3,4,5,6,7-hexahydro-1H-naphthalene
MOL002131	2,9-Dimethyldecane
MOL002130	cyclohexane,1,1,2,3-tetramethyl-
MOL002129	CYCLODODECENE
MOL002128	1,3,8-p-Menthatriene
MOL002127	Cnidilide
MOL002126	(1S,4R,5R)-1-isopropyl-4-methyl-4-bicyclo[3.1.0]hexanol
MOL002125	cis-Piperitol
MOL002124	beta-asarone
MOL002123	Chuanxiongol
MOL002121	(1S,4E,8E,10R)-4,8,11,11-tetramethylbicyclo[8.1.0]undeca-4,8-diene
MOL002120	betea-CUBEBENE
MOL002119	Artemisia triene
MOL002118	(4aS,7S,8aR)-7-isopropenyl-4a-methyl-1-methylenedecalin
MOL002117	β-sesquiphellandrene
MOL002116	(1R,4S,5R)-4-isopropenyl-1,8-dimethylspiro[4.5]dec-8-ene
MOL002115	m-Ethyltoluene
MOL002114	augustic-acid
MOL002113	1,2,3,4,4a,7-Hexahydro-l,6-dimethyl-4-(1-methylethyl)-naphthalene
MOL002112	alpha-Selinene
MOL002111	BdPh
MOL002110	Allocymene
MOL002109	Z-6,8',7,3'-diligustilide
MOL002108	(1S,5S)-7,7-dimethyl-2-methylenebicyclo[3.1.1]hept-3-ene
MOL002107	Valerophenone
MOL002106	1,1-Diethoxybutane
MOL002105	Senkyunolide-R
MOL002104	Senkyunolide-Q
MOL002103	Senkyunolide-P
MOL002102	Levistolid A
MOL002101	Senkyunolide-N
MOL002100	(3Z,6S,7R)-3-butylidene-6-butyryl-7-hydroxy-4,5,6,7-tetrahydroisobenzofuran-1-one
MOL002099	Senkyunolide-K
MOL002098	3-Butylidene-7-hydroxyphthalide
MOL002097	gem-Dimethylcyclopentane
MOL002096	(+)-ALPHA-FUNEBRENE
MOL000207	Methyleugenol
MOL002042	thymol
MOL000204	-cis-.beta.-Elemene diastereomer
MOL002028	(+)-beta-Phellandrene
MOL000202	Moslene
MOL000201	p-Ocimene
MOL000200	(S)-(+)-alpha-Phellandrene
MOL000198	(R)-linalool
MOL000197	Myrcene
MOL000196	L-Bornyl acetate
MOL000019	D-Camphene
MOL001819	METHYL PENTADECANOATE
MOL001788	adenine
MOL001787	ADO
MOL001752	EUG
MOL001729	Crysophanol
MOL000172	Furol
MOL000165	2-[(2S,5S,6S)-6,10-dimethylspiro[4.5]dec-9-en-2-yl]propan-2-ol
MOL001641	METHYL LINOLEATE
MOL001579	germacrene
MOL001390	49070_FLUKA
MOL001335	WLN: Q1R
MOL001306	o-Acetyl-p-cresol
MOL000126	(-)-nopinene
MOL000125	(-)-alpha-Pinene
MOL001223	(S)-2,2,3-Trimethylcyclopent-3-ene-1-acetaldehyde
MOL000122	1,8-cineole
MOL001210	(4S)-4-isopropylcyclohexene-1-carbaldehyde
MOL001201	(1R,5R,7S)-4,7-dimethyl-7-(4-methylpent-3-enyl)bicyclo[3.1.1]hept-3-ene
MOL000118	(L)-alpha-Terpineol
MOL002085	alpha-Cubebene
MOL000117	Cymol
MOL000116	Nonanal
MOL001055	5-isopropyl-2-methylbicyclo[3.1.0]hex-2-ene
MOL000103	PHB
COM9	3-Butylidenephthalide
COM8	3-butyl-1(3H)-Isobenzofuranone
COM7	3,5-O-dicaffeoylquinic acid
COM6	Oxypaeonidanin
COM53	8-shogaol
COM51	theobromine
COM5	Mudanpioside F
COM49	quercitrin
COM46	ginsenoside Rg1
COM45	ginsenoside Rd
COM44	ginsenoside Rb3
COM43	ginsenoside R1
COM42	ginsenoside F2
COM40	brucine
COM4	Gallic acid
COM39	berberine
COM38	cinnamyl alcohol
COM37	norephedrine,NE
COM36	methylephedrine,ME
COM35	methylephedrine hydrochloride
COM34	ephedrine,E
COM33	ephedrine hydrochloride
COM32	wogonoside
COM31	Oroxylin A-7-O-glucuronide
COM30	Apigenin-7-glucuronide
COM3	Benzoylpaeoniflorin
COM29	liquiritigenin, LG
COM28	isoliquiritin apioside
COM27	glycyrrhetic acid
COM26	yunaconitine,YAC
COM23	dopamine hydrochloride
COM22	crassicauline A, CCA
COM21	fangchinoline, FAN
COM20	sec-O-glucosylhamaudol
COM2	Benzoyloxypaeoniflorin
COM19	prim-O-glucosylcimifugin
COM18	5-O-methylvisammioside
COM17	4'-O-glucosyl-5-O-methylvisamminol
COM16	senkyunolide H
COM13	cryptochlorogenic acid
COM12	coniferyl ferulate
COM11	chlorogenic acid
COM10	butylidenephthalide
MOL000008	apigenin
MOL000073	ent-Epicatechin
MOL000208	()-Aromadendrene
MOL000211	Mairin
MOL000228	(2R)-7-hydroxy-5-methoxy-2-phenylchroman-4-one
MOL000266	beta-Cubebene
MOL000358	beta-sitosterol
MOL000359	sitosterol
MOL000415	rutin
MOL000417	Calycosin
MOL000431	coumarin
MOL000449	Stigmasterol
MOL000492	(+)-catechin
MOL000500	Vestitol
MOL000538	hypaconitine
MOL000552	5,2'-Dihydroxy-6,7,8-trimethoxyflavone
MOL000612	(-)-alpha-cedrene
MOL000787	Fumarine
MOL000991	cinnamaldehyde
MOL001320	Amygdalin
MOL001458	coptisine
MOL001484	Inermine
MOL001506	Supraene
MOL001739	zoomaric acid
MOL001744	uracil
MOL001771	poriferast-5-en-3beta-ol
MOL001792	DFV
MOL001910	11alpha,12alpha-epoxy-3beta-23-dihydroxy-30-norolean-20-en-28,12beta-olide
MOL001918	paeoniflorgenone
MOL001919	(3S,5R,8R,9R,10S,14S)-3,17-dihydroxy-4,4,8,10,14-pentamethyl-2,3,5,6,7,9-hexahydro-1H-cyclopenta[a]phenanthrene-15,16-dione
MOL001924	paeoniflorin
MOL001925	paeoniflorin_qt
MOL001927	albiflorin
MOL001930	benzoyl paeoniflorin
MOL001932	galloylpaeoniflorin
MOL001941	Ammidin
MOL001942	isoimperatorin
MOL001944	Marmesin
MOL001946	Ammijin
MOL002003	(-)-Caryophyllene oxide
MOL002089	mesaconitine
MOL002093	benzoylmesaconine
MOL002122	(Z)-Ligustilide
MOL002135	Myricanone
MOL002136	neocnidilide
MOL002140	Perlolyrine
MOL002151	senkyunone
MOL002157	wallichilide
MOL002200	Levistolide-A
MOL002202	tetramethylpyrazine
MOL002208	Senkyunolide A
MOL002211	11,14-eicosadienoic acid
MOL002311	Glycyrol
MOL002331	N-Methylflindersine
MOL002333	Tetraneurin A
MOL002341	Hesperetin
MOL002343	tetrandrine
MOL002372	(6Z,10E,14E,18E)-2,6,10,15,19,23-hexamethyltetracosa-2,6,10,14,18,22-hexaene
MOL002388	Delphin_qt
MOL002392	Deltoin
MOL002395	Deoxyandrographolide
MOL002397	karakoline
MOL002398	Karanjin
MOL002401	Neokadsuranic acid B
MOL002408	benzoylaconine
MOL002409	benzoylhypaconine
MOL002410	benzoylnapelline
MOL002415	6-Demethyldesoline
MOL002416	deoxyaconitine
MOL002419	(R)-Norcoclaurine
MOL002421	ignavine
MOL002422	isotalatizidine
MOL002424	Aconitine
MOL002430	Salsolinol
MOL002434	Carnosifloside I_qt
MOL002495	6-shogaol
MOL002565	Medicarpin
MOL002644	Phellopterin
MOL002697	junipene
MOL002714	baicalein
MOL002737	scutellarein
MOL002823	Herbacetin
MOL002844	Pinocembrin
MOL002879	Diop
MOL002881	Diosmetin
MOL002897	epiberberine
MOL002908	5,8,2'-Trihydroxy-7-methoxyflavone
MOL002909	5,7,2,5-tetrahydroxy-8,6-dimethoxyflavone
MOL002910	Carthamidin
MOL002911	2,6,2',4'-tetrahydroxy-6'-methoxychaleone
MOL002913	Dihydrobaicalin_qt
MOL002914	Eriodyctiol (flavanone)
MOL002917	5,2',6'-Trihydroxy-7,8-dimethoxyflavone
MOL002925	5,7,2',6'-Tetrahydroxyflavone
MOL002926	dihydrooroxylin A
MOL002927	Skullcapflavone II
MOL002928	oroxylin a
MOL002931	scutellarin
MOL002933	5,7,4'-Trihydroxy-8-methoxyflavone
MOL002934	NEOBAICALEIN
MOL002935	Baicalin
MOL002937	DIHYDROOROXYLIN
MOL003410	Ziziphin_qt
MOL003522	()-Sativene
MOL003538	()-Ledene
MOL003588	Prangenidin
MOL003648	Inermin
MOL003656	Lupiwighteone
MOL004328	naringenin
MOL004355	Spinasterol
MOL004492	Chrysanthemaxanthin
MOL004576	taxifolin
MOL004793	Marmesine
MOL004798	delphinidin
MOL004805	(2S)-2-[4-hydroxy-3-(3-methylbut-2-enyl)phenyl]-8,8-dimethyl-2,3-dihydropyrano[2,3-f]chromen-4-one
MOL004806	euchrenone
MOL004808	glyasperin B
MOL004810	glyasperin F
MOL004811	Glyasperin C
MOL004814	Isotrifoliol
MOL004815	(E)-1-(2,4-dihydroxyphenyl)-3-(2,2-dimethylchromen-6-yl)prop-2-en-1-one
MOL004820	kanzonols W
MOL004824	(2S)-6-(2,4-dihydroxyphenyl)-2-(2-hydroxypropan-2-yl)-4-methoxy-2,3-dihydrofuro[3,2-g]chromen-7-one
MOL004827	Semilicoisoflavone B
MOL004828	Glepidotin A
MOL004829	Glepidotin B
MOL004833	Phaseolinisoflavan
MOL004838	8-(6-hydroxy-2-benzofuranyl)-2,2-dimethyl-5-chromenol
MOL004841	Licochalcone B
MOL004848	licochalcone G
MOL004849	3-(2,4-dihydroxyphenyl)-8-(1,1-dimethylprop-2-enyl)-7-hydroxy-5-methoxy-coumarin
MOL004855	Licoricone
MOL004856	Gancaonin A
MOL004857	Gancaonin B
MOL004863	3-(3,4-dihydroxyphenyl)-5,7-dihydroxy-8-(3-methylbut-2-enyl)chromone
MOL004864	5,7-dihydroxy-3-(4-methoxyphenyl)-8-(3-methylbut-2-enyl)chromone
MOL004866	2-(3,4-dihydroxyphenyl)-5,7-dihydroxy-6-(3-methylbut-2-enyl)chromone
MOL004879	Glycyrin
MOL004882	Licocoumarone
MOL004883	Licoisoflavone
MOL004884	Licoisoflavone B
MOL004885	licoisoflavanone
MOL004891	shinpterocarpin
MOL004892	licorice-saponin G2
MOL004898	(E)-3-[3,4-dihydroxy-5-(3-methylbut-2-enyl)phenyl]-1-(2,4-dihydroxyphenyl)prop-2-en-1-one
MOL004903	liquiritin
MOL004904	licopyranocoumarin
MOL004905	3,22-Dihydroxy-11-oxo-delta(12)-oleanene-27-alpha-methoxycarbonyl-29-oic acid
MOL004907	Glyzaglabrin
MOL004908	Glabridin
MOL004910	Glabranin
MOL004911	Glabrene
MOL004912	Glabrone
MOL004913	1,3-dihydroxy-9-methoxy-6-benzofurano[3,2-c]chromenone
MOL004914	1,3-dihydroxy-8,9-dimethoxy-6-benzofurano[3,2-c]chromenone
MOL004915	Eurycarpin A
MOL004932	glycyrrhizin
MOL004933	uralsaponin B
MOL004935	Sigmoidin-B
MOL004941	(2R)-7-hydroxy-2-(4-hydroxyphenyl)chroman-4-one
MOL004945	(2S)-7-hydroxy-2-(4-hydroxyphenyl)-8-(3-methylbut-2-enyl)chroman-4-one
MOL004948	Isoglycyrol
MOL004949	Isolicoflavonol
MOL004953	Liquiritin apioside
MOL004957	HMO
MOL004959	1-Methoxyphaseollidin
MOL004961	Quercetin der.
MOL004966	3'-Hydroxy-4'-O-Methylglabridin
MOL004974	3'-Methoxyglabridin
MOL004978	2-[(3R)-8,8-dimethyl-3,4-dihydro-2H-pyrano[6,5-f]chromen-3-yl]-5-methoxyphenol
MOL004980	Inflacoumarin A
MOL004988	Kanzonol F
MOL004989	6-prenylated eriodictyol
MOL004990	7,2',4'-trihydroxy－5-methoxy-3－arylcoumarin
MOL004993	8-prenylated eriodictyol
MOL004996	gadelaidic acid
MOL005000	Gancaonin G
MOL005001	Gancaonin H
MOL005003	Licoagrocarpin
MOL005007	Glyasperins M
MOL005008	Glycyrrhiza flavonol A
MOL005012	Licoagroisoflavone
MOL005013	18α-hydroxyglycyrrhetic acid
MOL005016	Odoratin
MOL005017	Phaseol
MOL005018	Xambioona
MOL005020	dehydroglyasperins C
MOL005030	gondoic acid
MOL005043	campest-5-en-3beta-ol
MOL005089	Oxypaeoniflorin
MOL005190	eriodictyol
MOL005279	ginsenoside-Rh1
MOL005286	20(R)-ginsenoside Rg2
MOL005308	Aposiopolamine
MOL005314	Celabenzine
MOL005317	Deoxyharringtonine
MOL005318	Dianthramine
MOL005320	arachidonate
MOL005321	Frutinone A
MOL005325	ginsenoside Ro
MOL005331	ginsenoside Rb1
MOL005333	ginsenoside-Rb2
MOL005336	ginsenoside-Rc
MOL005338	Ginsenoside Re
MOL005342	Ginsenoside-Rg3
MOL005344	ginsenoside rh2
MOL005348	Ginsenoside-Rh4_qt
MOL005356	Girinimbin
MOL005357	Gomisin B
MOL005360	malkangunin
MOL005376	Panaxadiol
MOL005384	suchilactone
MOL005399	alexandrin_qt
MOL005401	ginsenoside Rg5_qt
MOL005573	Genkwanin
MOL006131	8-gingerol
MOL008206	Moslosooflavone
MOL009092	Pentagalloylglucose
MOL010415	11,13-Eicosadienoic acid, methyl ester
MOL010788	leucopelargonidin
MOL010922	Diisooctyl succinate
MOL011400	ginsenoside rf
MOL011730	11-hydroxy-sec-o-beta-d-glucosylhamaudol_qt
MOL011732	anomalin
MOL011734	Cimifugin
MOL011737	divaricatacid
MOL011740	divaricatol
MOL011747	ledebouriellol
MOL011749	phelloptorin
MOL011753	5-O-Methylvisamminol
MOL012245	5,7,4'-trihydroxy-6-methoxyflavanone
MOL012246	5,7,4'-trihydroxy-8-methoxyflavanone
MOL012266	rivularin
MOL012922	l-SPD
MOL013077	Decursin
